# Supplementary material for: Impact of the virus purification protocol on aggregation and electrokinetics of MS2 phages and corresponding virus-like particles
Source: Royal Society of Chemistry journal article supplement (doi:10.1039/c3cp44128h), 2013-01-01
Supplement: c3cp44128h.pdf [file c3cp44128h.pdf]

## SUPPORTING INFORMATION

Impact of virus purification protocol on aggregation and electrokinetics  
of MS2 phage and corresponding VLPs.

C. Dika<sup>1,2</sup>, C. Gantzer<sup>1,2\*</sup>, A. Perrin<sup>1,2</sup> and J. F. L. Duval<sup>3,4\*</sup>

<sup>1</sup>Université de Lorraine, LCPME (Laboratoire de Chimie Physique et Microbiologie pour  
l'Environnement), UMR 7564, Nancy, F-54001, France.

<sup>2</sup>CNRS, LCPME, UMR 7564, Nancy, F-54001, France

<sup>3</sup>Université de Lorraine, LEM (Laboratoire Environnement et Minéralurgie), UMR 7569,  
Vandoeuvre-lès-Nancy F-54501, France.

<sup>4</sup>CNRS, LEM, UMR 7569, Vandoeuvre-lès-Nancy, F-54501, France

Corresponding authors:

\* Jérôme F.L. Duval. E-mail address: [jerome.duval@univ-lorraine.fr](mailto:jerome.duval@univ-lorraine.fr) (J.F.L. Duval)

Tel: +33 3 83 59 62 63. Fax: +33 3 83 59 62 55.

\* Christophe Gantzer. E-mail address: [christophe.gantzer@univ-lorraine.fr](mailto:christophe.gantzer@univ-lorraine.fr) (C. Gantzer)

Tel: +33 3 83 68 22 91. Fax: +33 3 83 68 23 78.

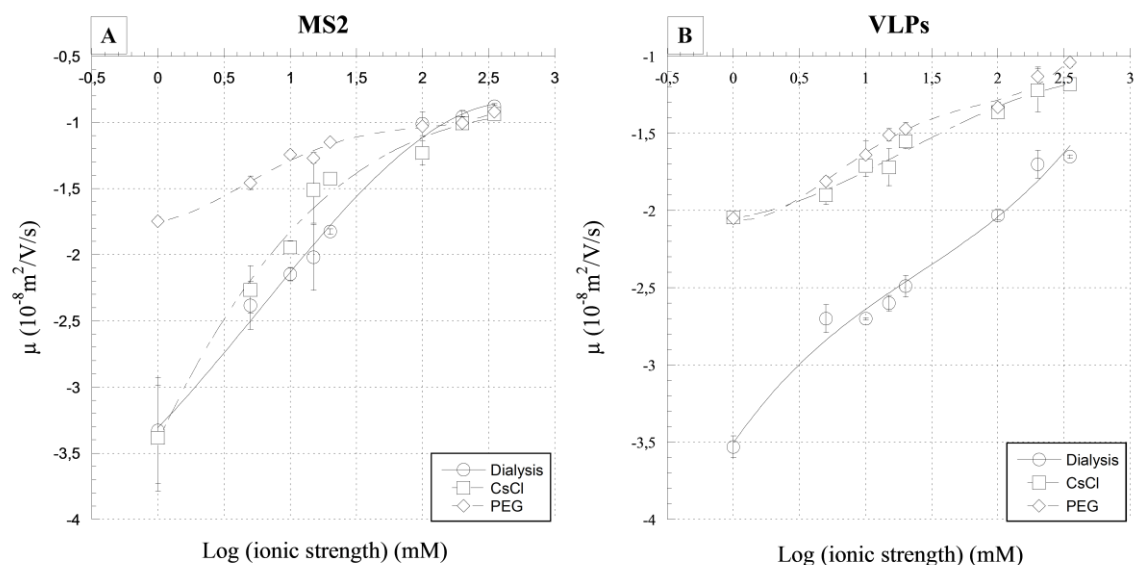

Fig S1: Electrophoretic mobilities of MS2 bacteriophages (A) and MS2-VLPs (B) as a function of log of ionic strength at pH 7 after three different purification protocols: dialysis, ultracentrifugation by cesium chloride gradient and polyethylene glycol (PEG) precipitation. The solid and dotted lines are only guides to the eye.
